# Supplementary material
Source: publisher figshare collection journal article supplement (https://sage.figshare.com/ndownloader/files/15449750)
Supplement: Supplementary file 1 [file 15449750]

# Supplemental Appendix 1. Survey of Former Post-Sophomore Fellows

Questions with an asterisk (\*) are required for survey submission.

1. Please enter your name.
2. In which time frame did you complete your post-sophomore fellowship?
  - ☐ 1-5 years ago
  - ☐ 6-10 years ago
  - ☐ 10+ years ago
3. Are you currently practicing medicine? \*
  - ☐ Yes.
  - ☐ No. (If not, what is your current position?)
4. In which field did you complete a residency? \*
5. At which institution did you complete your residency? \*
6. If you've completed fellowships, in which fields were they?\*
7. At which institutions(s) were your fellowships?\*
8. Were there negative aspects of the post-sophomore fellowship? If so, please describe. \*
  - ☐ Yes. (Free-response text box provided)
  - ☐ No.
9. How did you find out about the post-sophomore fellowship?
  - ☐ Peer medical student
  - ☐ PSF luncheon
  - ☐ Pathology small group
  - ☐ Pathology lecture
  - ☐ Other
10. Please list your top two reasons for doing the post-sophomore fellowship: \*
  - ☐ Interested in pathology as a career
  - ☐ Wanted a year of breathing room from medical school
  - ☐ Unsure about specialty choice
  - ☐ Wanted to sync years with a partner/spouse
  - ☐ Encouraged by pathology small group facilitator
  - ☐ Interest in research
  - ☐ Other: (free-response text box provided)
11. How did the post-sophomore fellowship help you in becoming a physician, either through residency, fellowship, or practice? (Free-response text box provided).
